# Supplementary material for: Interrogating process deficiencies in large-scale hydrologic models with interpretable machine learning
Source: Copernicus journal article supplement (doi:10.5194/egusphere-2024-3235), 2024-11-13
Supplement: Supplementary file 1 [file egusphere-2024-3235-supplement.pdf]

## **Supplement to Interrogating process deficiencies in large-scale hydrologic models with interpretable machine learning**

Admin Husic<sup>1\*</sup>, John Hammond<sup>2</sup>, Adam N. Price<sup>3</sup>, and Joshua K. Roundy<sup>4</sup>

<sup>1</sup> Department of Civil and Environmental Engineering, Virginia Tech, Blacksburg, Virginia, USA – ORCID: 0000-0002-4225-2252

<sup>2</sup> U.S. Geological Survey, Maryland-Delaware-D.C. Water Science Center, Catonsville, Maryland, USA – ORCID: 0000-0002-4935-0736

<sup>3</sup> USDA Forest Service, Pacific Northwest Research Station, La Grande, Oregon, USA – ORCID: 0000-0002-7211-4758

<sup>4</sup> Department of Civil, Environmental and Architectural Engineering, University of Kansas, Lawrence, Kansas, USA – ORCID: 0000-0003-0328-3248

\*Admin Husic, [husic@vt.edu](mailto:husic@vt.edu), Occoquan Watershed Monitoring Laboratory, Virginia Tech, Manassas, VA 20110

Any use of trade, firm, or product names is for descriptive purposes only and does not imply endorsement by the U.S. Government.

**Table S1.** Predictor types, variable names, and BasinATLAS reference names (Linke et al., 2019).

| Variable Name (and type) |                        | BasinATLAS Name |
|--------------------------|------------------------|-----------------|
| Climate                  | Precipitation          | pre_mm_syr      |
|                          | Potential ET.          | pet_mm_syr      |
|                          | Actual ET.             | aet_mm_syr      |
|                          | Aridity Index          | ari_ix_sav      |
|                          | Air Temp. Min.         | tmp_dc_smn      |
|                          | Air Temp. Max.         | tmp_dc_smx      |
|                          | Air Temp. Avg.         | tmp_dc_syr      |
|                          | Snow Cover Max.        | snw_pc_smx      |
|                          | Snow Cover Avg.        | snw_pc_syr      |
|                          | Permafrost Extent      | prm_pc_sse      |
|                          | Glacier Extent         | gla_pc_sse      |
| Hydrology                | Natural Discharge Min. | dis_m3_pmn      |
|                          | Natural Discharge Max. | dis_m3_pmx      |
|                          | Natural Discharge Avg. | dis_m3_pyr      |
|                          | Naturalized Runoff     | run_mm_syr      |
|                          | River Area             | ria_ha_usu      |
|                          | River Volume           | riv_tc_usu      |
|                          | Inundation Extent Min. | inu_pc_smn      |
|                          | Inundation Extent Max. | inu_pc_smx      |
|                          | Lake Area Percent      | lka_pc_sse      |
|                          | Lake Volume            | lkv_mc_usu      |
|                          | Reservoir Volume       | rev_mc_usu      |
|                          | Regulation by Dams     | dor_pc_pva      |
| Topography               | Basin Area             | area            |
|                          | Elevation Avg.         | ele_mt_sav      |
|                          | Elevation Min.         | ele_mt_smn      |
|                          | Elevation Max.         | ele_mt_smx      |
|                          | Stream Gradient        | sgr_dk_sav      |
| Basin Slope              | slp_dg_sav             |                 |
| Soils & Geology          | Clay Fraction          | cly_pc_sav      |
|                          | Silt Fraction          | slt_pc_sav      |
|                          | Sand Fraction          | snd_pc_sav      |
|                          | Soil Water Content     | swc_pc_syr      |
|                          | Soil Organic Carbon    | soc_th_sav      |
|                          | Groundwater Depth      | gwt_cm_sav      |
|                          | Karst Cover            | kar_pc_sse      |
| Natural                  | Forest Cover           | for_pc_sse      |
|                          | Wetlands               | wet_pc_sg2      |
|                          | Protected Area         | pac_pc_sse      |
| Agriculture              | Cropland               | crp_pc_sse      |
|                          | Irrigated Area         | ire_pc_sse      |
|                          | Pasture                | pst_pc_sse      |
|                          | Soil Erosion           | ero_kh_sav      |
| Urban                    | Urban Extent           | urb_pc_sse      |
|                          | Road Density           | rdd_mk_sav      |
|                          | Population Count       | pop_ct_usu      |
|                          | Population Density     | ppd_pk_sav      |
|                          | Human Footprint        | hft_ix_s09      |

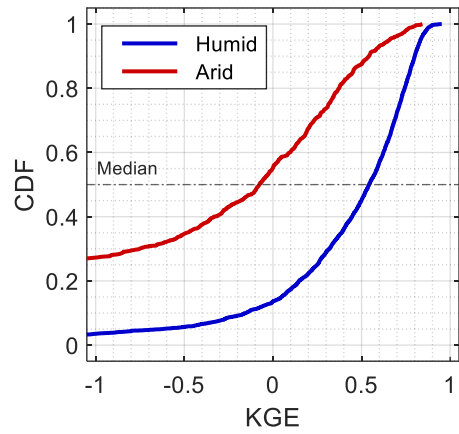

**Figure S1.** Cumulative distribution function (CDF) of National Hydrologic Model performance for humid ( $PET/P < 1$ ,  $n = 3,827$ ) and arid ( $PET/P > 1$ ,  $n = 787$ ) sites as assessed by the Kling–Gupta efficiency (KGE) evaluation metric.

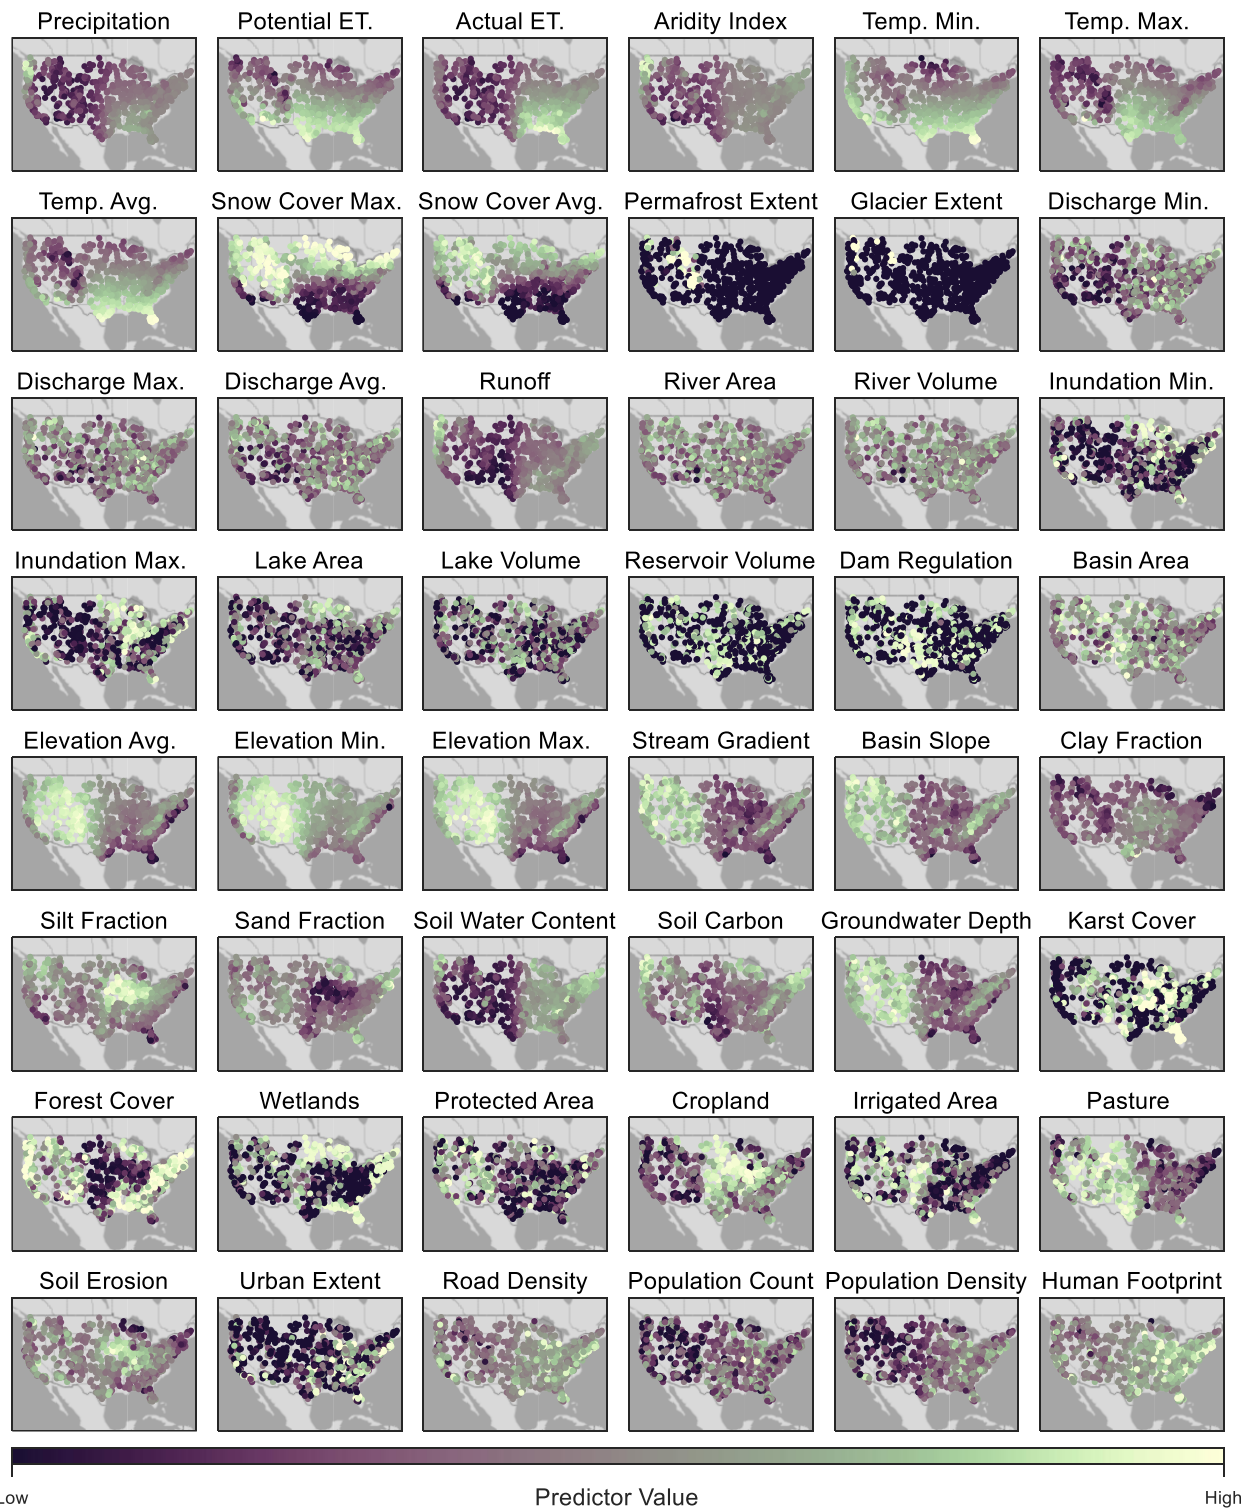

**Figure S2.** Catchment attributes plotted for the study basins. For a full description of variables see Table S1. The color scale for each predictor is based on a Box-Cox transformation of the data to highlight spatial gradients, not absolute values of features.

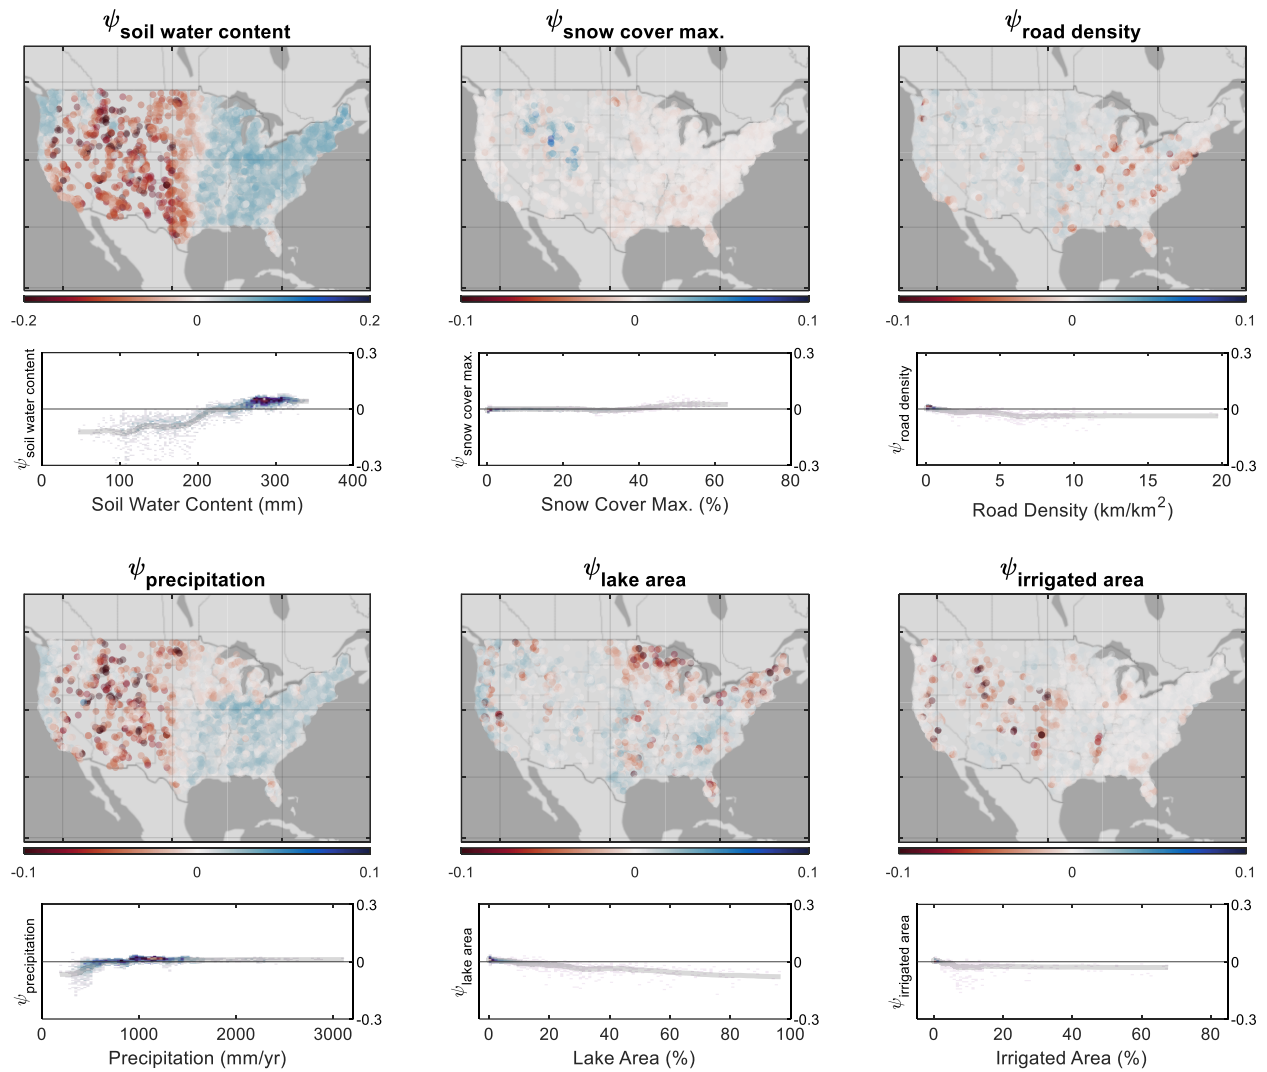

**Figure S3.** Spatial distribution of Shapley values ( $\psi$ ) for selected influential features and their impact on Kling–Gupta efficiency (KGE) prediction for the National Hydrologic Model (NHM). The partial dependence plot of each feature is shown. Features value distributions are represented with a heatmap. A moving average of feature values is indicated by a line to show general trends.

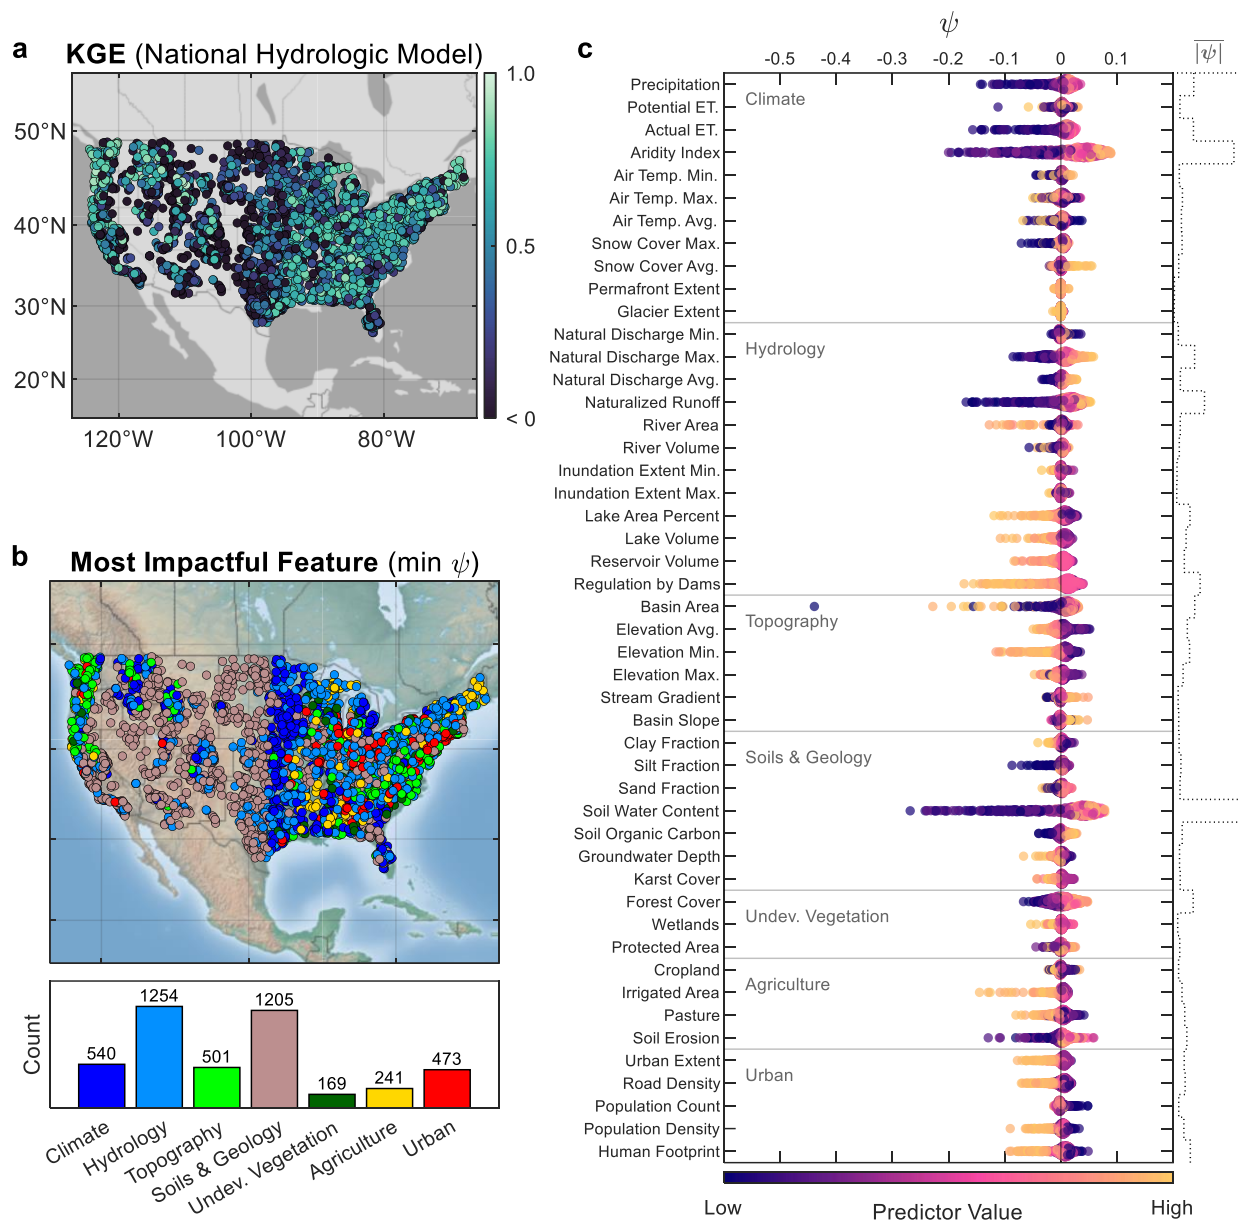

**Figure S4.** (a) Map of Kling–Gupta efficiency (KGE) for the National Hydrologic Model (NHM). (b) Map and histogram of the most impactful feature causing poor model performance at each site, i.e., the predictor group having the greatest negative Shapley value ( $\psi$ ) at a site. (c) Swarm chart of Shapley values for KGE prediction showing feature importance for 48 predictors. The staircase plot on the right axis indicates the mean absolute Shapley value ( $|\overline{\psi}|$ ) of all observations for a predictor.

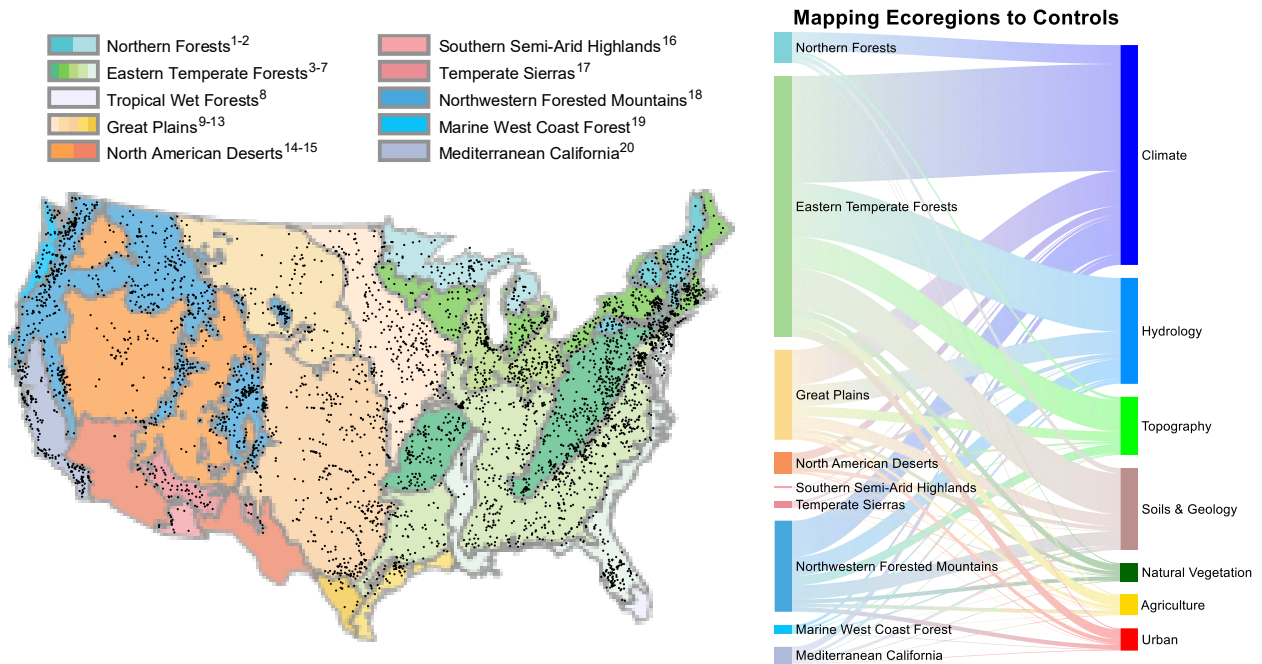

**Figure S5.** Map of study stream gages (black markers) and the Ecological Regions of North America (as defined in Omernik, 1987). Sankey diagram showing the pairing of ecoregions and impactful feature classes for the National Hydrologic Model (NHM) for the Kling–Gupta efficiency (KGE) evaluation metric. Superscripts in ecoregion classifications are defined in Section 2.3.
